# Supplementary material for: Designing shape anisotropic SmCo5 particles by chemical synthesis to reveal the morphological evolution mechanism
Source: Royal Society of Chemistry journal article supplement (doi:10.1039/c8nr02893a), 2018-01-01
Supplement: c8nr02893a1.pdf [file c8nr02893a1.pdf]

## **Designing Shape Anisotropic SmCo<sub>5</sub> Particles by Chemical Synthesis to Reveal Morphological Evolution Mechanism**

Zhenhui Ma<sup>1</sup>, Ming Yue<sup>1\*</sup>, Qiong Wu<sup>1</sup>, Chenglin Li<sup>1</sup> and Yongsheng Yu<sup>2\*</sup>

<sup>1</sup>College of Materials Science and Engineering, Beijing University of Technology, Beijing 100124, China.

<sup>2</sup>MIT Key Laboratory of Critical Materials Technology for New Energy Conversion and Storage, School of Chemistry and Chemical Engineering, Harbin Institute of Technology, Harbin, Heilongjiang 150001, China.

E-mail: [yueming@bjut.edu.cn](mailto:yueming@bjut.edu.cn) and [ysyu@hit.edu.cn](mailto:ysyu@hit.edu.cn)

## Experimental Procedures

**Synthesis of SmCo-C<sub>2</sub>O<sub>4</sub>:** The precursor was synthesized *via* co-precipitation of samarium chloride hexahydrate (SmCl<sub>3</sub>·6H<sub>2</sub>O), cobalt nitrate hexahydrate (Co(NO<sub>3</sub>)<sub>2</sub>·6H<sub>2</sub>O) and sodium oxalate (Na<sub>2</sub>C<sub>2</sub>O<sub>4</sub>) with Sm : Co molar ratio of 1 : 3.2. In a typical synthesis, 0.5000 g of Co(NO<sub>3</sub>)<sub>2</sub>·6H<sub>2</sub>O, and 0.1959 g of SmCl<sub>3</sub>·6H<sub>2</sub>O were dissolved in 70 ml of deionized water. Then, the mixture was loaded into a 250 ml three-neck bottle with vigorous mechanical stirring. 0.3719 g of Na<sub>2</sub>C<sub>2</sub>O<sub>4</sub> (10% excessive) was dissolved in 30 ml of deionized water. At room temperature, under mechanical stirring and ultrasonic concussion, Na<sub>2</sub>C<sub>2</sub>O<sub>4</sub> solution was added to the solution dropwise for 5 min. After the reaction ran for 1 h, the mixture was centrifuged at 5000 rpm for 3 min. The precipitate was twice rinsed in deionized water to wash away sodium chloride (NaCl) or sodium nitrate (NaNO<sub>3</sub>) and extra Na<sub>2</sub>C<sub>2</sub>O<sub>4</sub>. The precipitate was further washed with anhydrous alcohol and dried at room temperature to obtain a mixture of Sm<sub>2</sub>(C<sub>2</sub>O<sub>4</sub>)<sub>3</sub>·10H<sub>2</sub>O and CoC<sub>2</sub>O<sub>4</sub>·2H<sub>2</sub>O.

**Synthesis of SmCo-C<sub>2</sub>O<sub>4</sub>/CaC<sub>2</sub>O<sub>4</sub>:** A similar procedure was operated like the preparation of SmCo-C<sub>2</sub>O<sub>4</sub>, and the difference is the extra addition of 0.5000 g Ca(NO<sub>3</sub>)<sub>2</sub>·4H<sub>2</sub>O. In a typical synthesis, 0.5000 g of Co(NO<sub>3</sub>)<sub>2</sub>·6H<sub>2</sub>O, 0.1959 g of SmCl<sub>3</sub>·6H<sub>2</sub>O and 0.5000g Ca(NO<sub>3</sub>)<sub>2</sub>·4H<sub>2</sub>O were dissolved in 70 ml of deionized water in a 250 ml three-neck bottle. 0.6840 g of Na<sub>2</sub>C<sub>2</sub>O<sub>4</sub> was dissolved in 30 ml deionized water. The co-precipitation, with the assistance of ultrasonic concussion, was carried out to obtain a mixture of Sm<sub>2</sub>(C<sub>2</sub>O<sub>4</sub>)<sub>3</sub>·10H<sub>2</sub>O, CoC<sub>2</sub>O<sub>4</sub>·2H<sub>2</sub>O, and CaC<sub>2</sub>O<sub>4</sub>·2H<sub>2</sub>O with a Sm/Co ratio of 1:3.2. To prepare SmCo-C<sub>2</sub>O<sub>4</sub>/CaC<sub>2</sub>O<sub>4</sub> with different Sm/Co ratios, the amount of SmCl<sub>3</sub> was changed while keeping the amounts of Co(NO<sub>3</sub>)<sub>2</sub> and Ca(NO<sub>3</sub>)<sub>2</sub> constant at 0.5000 g. Quantities of 0.2506 g, 0.2089 g, 0.179 g, 0.1567 g, 0.1253 g and 0.0895 g

$\text{SmCl}_3 \cdot 6\text{H}_2\text{O}$  were used to synthesize  $\text{SmCo-C}_2\text{O}_4/\text{CaC}_2\text{O}_4$  with Sm/Co ratios of 1:2.5, 1:3.0, 1:3.5, 1:4, 1:5 and 1:7, respectively.

**Synthesis of  $\text{SmCo}_5$  particles:** For the synthesis of  $\text{SmCo}_5$  particles, previously prepared precursor powders were mixed with 3.0 g of calcium (Ca) powders and 1.0 g of anhydrous potassium chloride (KCl). Subsequently, the mixture was transferred to a tungsten crucible which was then moved into a steel tube and degassed three times to remove air and moisture. The tube was flushed with Ar and heated to different temperatures (890 °C, 910 °C, 930 °C and 950 °C) at a rate of 8 °C·min<sup>-1</sup>. The reaction was maintained for 90 min before cooling down to room temperature within 1 h. Afterwards, the product was washed with deionized water and 5% chlorhydric acid to dissolve CaO, KCl, and extra Ca. A black powder was obtained by centrifuging at 8000 r/min for 3 min. The powder was further washed with deionized water and ethanol and dried under vacuum for further usage.

**Annealing of  $\text{SmCo-C}_2\text{O}_4$ :**  $\text{SmCo-C}_2\text{O}_4$  precursors with Sm/Co of 1:3.2 without addition of Ca and KCl were placed in alumina boat and the boat was put in tube furnace which was degassed for 3 times to remove air and moisture. The temperature was raised to 500 °C and 700 °C at a heating rate of 8 °C·min<sup>-1</sup> and kept for 1.5 h under an Ar atmosphere. After cooling the mixture down to room temperature, the mixture of Co and  $\text{Sm}_2\text{O}_3$  was obtained.

**Characterization:** The crystallographic structure was identified by X-ray diffraction (XRD, D/MAX 2200 PC) with  $\text{Cu-K}_\alpha$  radiation ( $\lambda=0.15418$  nm). The microstructure and morphology of the above samples were investigated using scanning electron microscopy (SEM, ZEISS - SUPRA55) and transmission electron microscopy (TEM, Tecnai G2 F20). The magnetic properties were measured at room temperature using a Physical Property Measurement System (PPMS) under

a maximum applied field of 70 kOe. To obtain aligned samples, the cylindrical samples were prepared by mixing the as-prepared  $\text{SmCo}_5$  powders with epoxy, which would solidify slowly when the samples were aligned in static magnetic field of 2.2 T.

## Supplemental Data

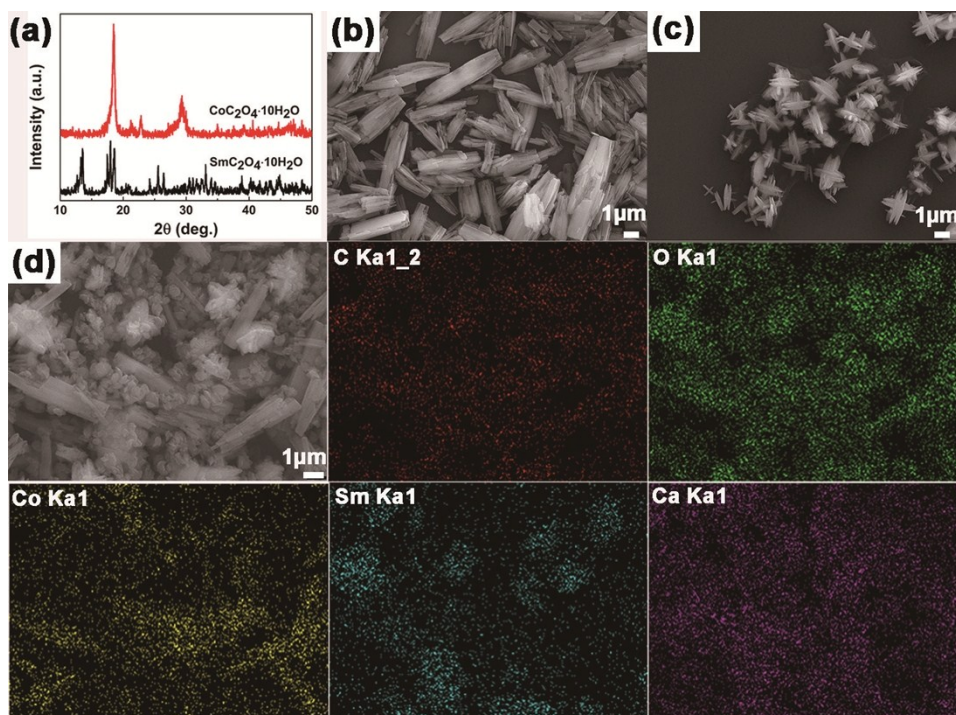

Fig. S1 (a) XRD patterns of single  $\text{Sm}_2(\text{C}_2\text{O}_4)_3 \cdot 10\text{H}_2\text{O}$  and  $\text{CoC}_2\text{O}_4 \cdot 2\text{H}_2\text{O}$ ; (b) SEM image of  $\text{CoC}_2\text{O}_4 \cdot 2\text{H}_2\text{O}$ ; (c) SEM image of  $\text{Sm}_2(\text{C}_2\text{O}_4)_3 \cdot 10\text{H}_2\text{O}$ ; (d) SEM image of  $\text{SmCo-C}_2\text{O}_4/\text{CaC}_2\text{O}_4$  and corresponding elemental mapping.

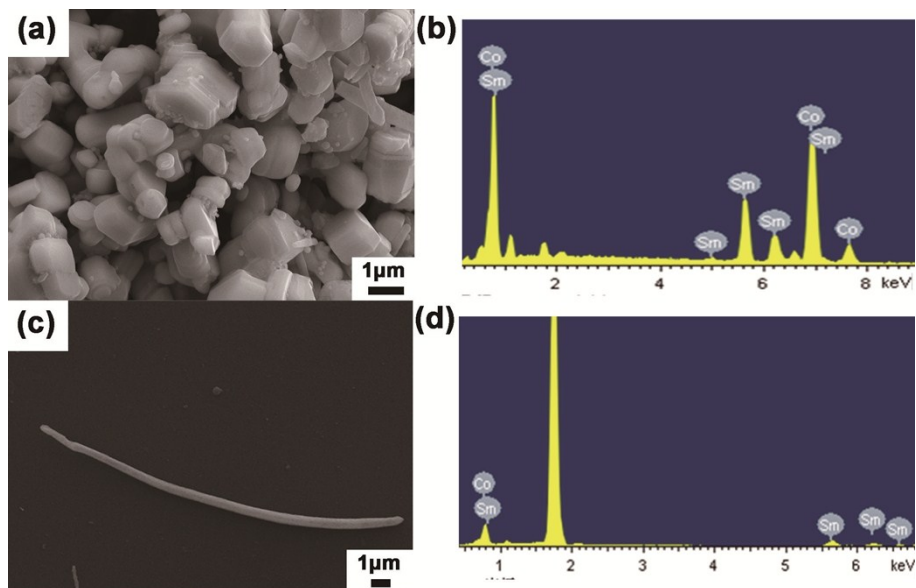

Fig. S2 (a) SEM images of hexagonal  $\text{SmCo}_5$  particles prepared by reductive annealing of  $\text{SmCoC}_2\text{O}_4/\text{CaC}_2\text{O}_4$  with Sm/Co ratio of 1:3.2; (b) corresponding EDS of (a) with measured Sm/Co ratio of 1:4.21; (c) single  $\text{SmCo}_5$  rod in another view; (d) corresponding EDS of (c) with measured Sm/Co ratio of 1:4.3.

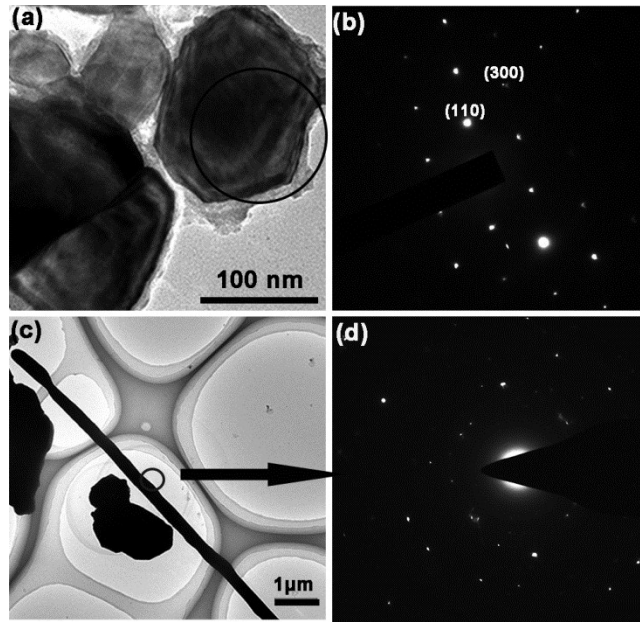

Fig. S3 (a) TEM images of hexagonal particles in  $\text{SmCo}_5$  prepared by reductive annealing of  $\text{SmCo-C}_2\text{O}_4/\text{CaC}_2\text{O}_4$  with  $\text{Sm/Co}$  of 1:3.2; (b) corresponding SAED of (a), which exhibits symmetric hexagonal diffraction spots and implies a single structure, suggesting hexagonal planes perpendicular to the direction of the  $c$ -axis; (c)  $\text{SmCo}_5$  rod in another view; (d) corresponding SAED of (c), demonstrating polycrystalline structure in the circled field of (c).

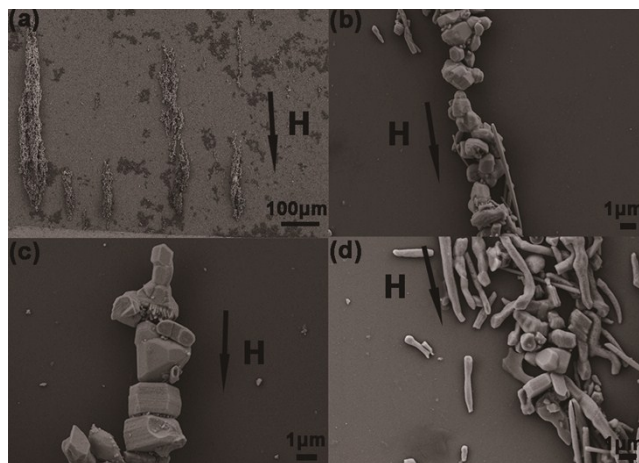

Fig. S4 SEM images of magnetically aligned  $\text{SmCo}_5$  particles. (a) low-magnification image; (b) high-magnification image which implies that hexagonal particles and rods are well-arrayed along the magnetic field direction; (c) high-magnification image in different view which describes well-arrayed  $\text{SmCo}_5$  hexagonal particles; (d) high-magnification image in different view which demonstrates that most of rods have uniform directions along the magnetic field direction.



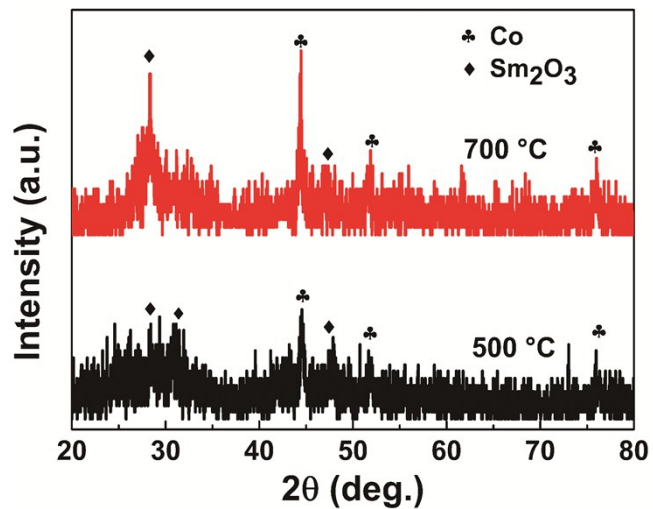

Fig. S5 XRD patterns of SmCo-C<sub>2</sub>O<sub>4</sub>, without Ca addition, annealed at different temperatures.

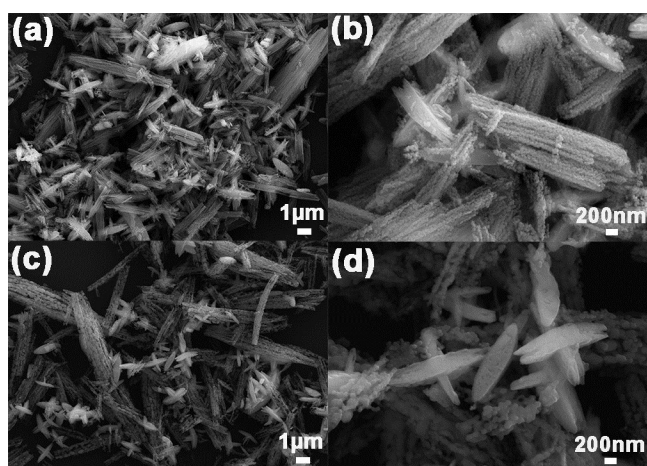

Fig. S6 SEM images of SmCo-C<sub>2</sub>O<sub>4</sub>, without Ca addition, annealed at different temperatures: (a)-(b) 500 °C; (c)-(d) 700 °C.

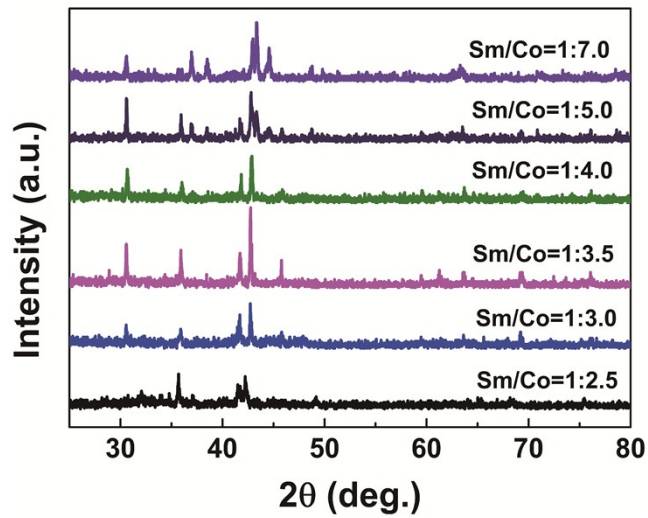

Fig. S7 XRD patterns of SmCo alloys prepared by reductive annealing of  $\text{SmCo-C}_2\text{O}_4/\text{CaC}_2\text{O}_4$  with different Sm/Co ratios at 930 °C.

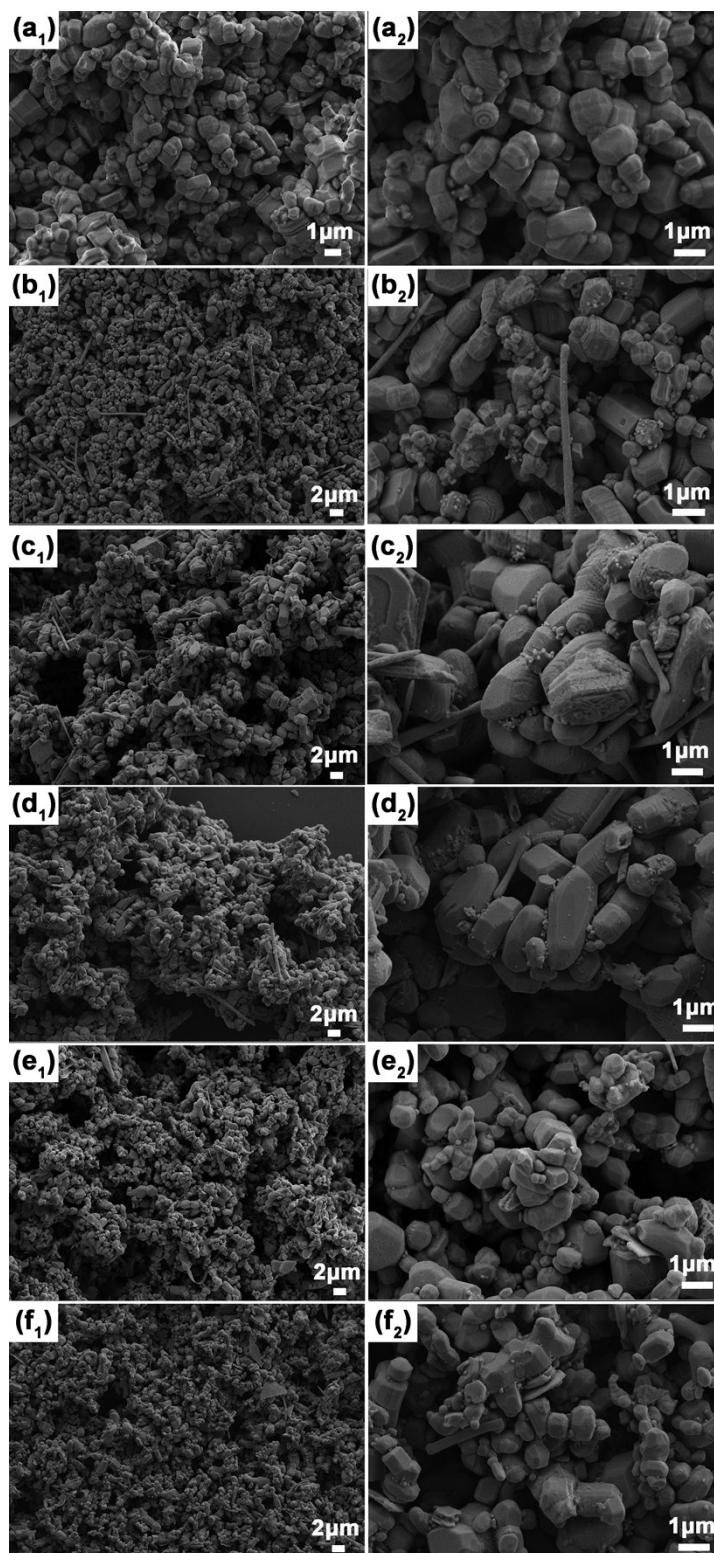

Fig. S8 SEM o of SmCo alloys prepared by reductive annealing of SmCo-C<sub>2</sub>O<sub>4</sub>/CaC<sub>2</sub>O<sub>4</sub> with different Sm/Co ratios at 930 °C: (a1) 1:2.5; (b1) 1:3.0; (c1) 1:3.5; (d1) 1:4.0; (e1) 1:5.0; (f1) 1:7.0, where (a2)-(f2) is the corresponding magnified images of (a1)-(f1), respectively.

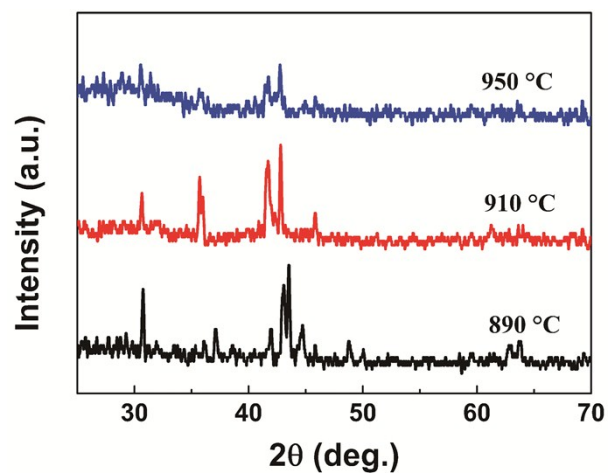

Fig. S9 XRD patterns of SmCo alloys prepared by reductive annealing of  $\text{SmCo-C}_2\text{O}_4/\text{CaC}_2\text{O}_4$  with Sm/Co of 1:3.2 at different temperatures.

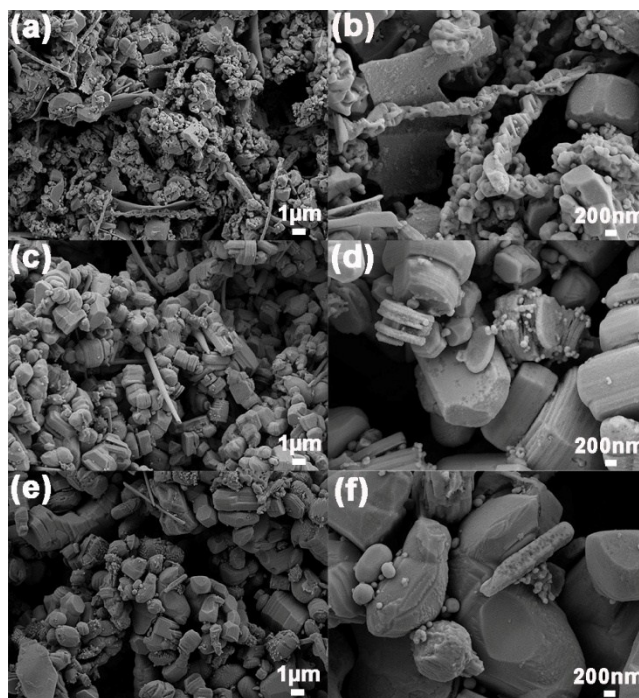

Fig. S10 SEM images of SmCo alloys prepared by reductive annealing of  $\text{SmCo-C}_2\text{O}_4/\text{CaC}_2\text{O}_4$  with Sm/Co of 1:3.2 at different temperatures: (a)-(b) 890 °C; (c)-(d) 910 °C; (e)-(f) 950 °C.
